# Supplementary material for: A systematic and meta-analysis review on the diagnostic accuracy of antibodies in the serological diagnosis of COVID-19
Source: Springer Nature journal article supplement (doi:10.1186/s13643-021-01689-3), 2021-05-26
Supplement: MOESM2 [file 19200022]

## Additional table 1: Chemiluminescence Immunoassays Subgroup Meta-analysis

### a: IgG based CLIA

Diagnostic Random-Effects Model

#### Metric: Sensitivity

Model Results

| Subgroups           | Studies | Estimate | Lower bound | Upper bound | Std. error | p-Val   | z-Val |
|---------------------|---------|----------|-------------|-------------|------------|---------|-------|
| Subgroup S          | 2       | 0.894    | 0.423       | 0.990       | 1.243      | 0.087   | 1.711 |
| Subgroup N          | 2       | 0.909    | 0.687       | 0.979       | 0.774      | 0.003   | 2.973 |
| Subgroup S-N        | 3       | 0.904    | 0.681       | 0.977       | 0.758      | 0.003   | 2.959 |
| Subgroup Not stated | 1       | 0.957    | 0.845       | 0.989       | 0.723      | NA      | NA    |
| Subgroup E-N        | 1       | 0.971    | 0.664       | 0.998       | 1.435      | NA      | NA    |
| Overall             | 9       | 0.915    | 0.818       | 0.963       | 0.446      | < 0.001 | 5.327 |

#### Heterogeneity

| Studies             | Q (df)      | Het. p-Val | I <sup>2</sup> |
|---------------------|-------------|------------|----------------|
| Subgroup S          | 37.405 (1)  | < 0.001    | 97.33 %        |
| Subgroup N          | 12.178 (1)  | < 0.001    | 91.79 %        |
| Subgroup S-N        | 20.236 (2)  | < 0.001    | 90.12 %        |
| Subgroup Not stated | NA          | NA         | NA             |
| Subgroup E-N        | NA          | NA         | NA             |
| Overall             | 124.266 (8) | < 0.001    | 93.56 %        |

Diagnostic Random-Effects Model

**Metric: Specificity**

Model Results

| Subgroups           | Studies | Estimate | Lower bound | Upper bound | Std. error | p-Val   | z-Val |
|---------------------|---------|----------|-------------|-------------|------------|---------|-------|
| Subgroup S          | 2       | 0.998    | 0.991       | 1.000       | 0.817      | < 0.001 | 7.732 |
| Subgroup N          | 2       | 0.975    | 0.918       | 0.993       | 0.640      | < 0.001 | 5.736 |
| Subgroup S-N        | 3       | 0.950    | 0.845       | 0.985       | 0.637      | < 0.001 | 4.619 |
| Subgroup Not stated | 1       | 0.967    | 0.939       | 0.982       | 0.322      | NA      | NA    |
| Subgroup E-N        | 1       | 0.012    | 0.001       | 0.167       | 1.423      | NA      | NA    |
| Overall             | 9       | 0.961    | 0.901       | 0.985       | 0.501      | < 0.001 | 6.376 |

Heterogeneity

| Studies             | Q (df)     | Het. p-Val | I <sup>2</sup> |
|---------------------|------------|------------|----------------|
| Subgroup S          | 0.059 (1)  | 0.808      | 0 %            |
| Subgroup N          | 0.001 (1)  | 0.975      | 0 %            |
| Subgroup S-N        | 16.134 (2) | < 0.001    | 87.6 %         |
| Subgroup Not stated | NA         | NA         | NA             |
| Subgroup E-N        | NA         | NA         | NA             |
| Overall             | 59.249 (8) | < 0.001    | 86.5 %         |

**b: IgM CLIA**

Diagnostic Random-Effects Model

**Metric: Sensitivity**

Model Results

| Subgroups           | Studies | Estimate | Lower bound | Upper bound | Std. error | p-Val   | z-Val |
|---------------------|---------|----------|-------------|-------------|------------|---------|-------|
| Subgroup S          | 3       | 0.860    | 0.494       | 0.975       | 0.938      | 0.053   | 1.935 |
| Subgroup N          | 2       | 0.793    | 0.742       | 0.835       | 0.144      | < 0.001 | 9.317 |
| Subgroup S-N        | 3       | 0.721    | 0.442       | 0.894       | 0.603      | 0.115   | 1.576 |
| Subgroup Not stated | 1       | 0.979    | 0.864       | 0.997       | 1.011      | NA      | NA    |
| Subgroup E-N        | 1       | 0.938    | 0.665       | 0.991       | 1.033      | NA      | NA    |

|         |    |       |       |       |       |         |       |
|---------|----|-------|-------|-------|-------|---------|-------|
| Overall | 10 | 0.829 | 0.724 | 0.900 | 0.314 | < 0.001 | 5.024 |
|---------|----|-------|-------|-------|-------|---------|-------|

### Heterogeneity

| Studies             | Q (df)      | Het. p-Val | I <sup>2</sup> |
|---------------------|-------------|------------|----------------|
| Subgroup S          | 72.825 (2)  | < 0.001    | 97.25 %        |
| Subgroup N          | 0.573 (1)   | 0.449      | 0 %            |
| Subgroup S-N        | 24.053 (2)  | < 0.001    | 91.69 %        |
| Subgroup Not stated | NA          | NA         | NA             |
| Subgroup E-N        | NA          | NA         | NA             |
| Overall             | 136.827 (9) | < 0.001    | 93.42 %        |

### Diagnostic Random-Effects Model

Metric: Specificity  
Model Results

| Subgroups           | Studies | Estimate | Lower bound | Upper bound | Std. error | p-Val   | z-Val |
|---------------------|---------|----------|-------------|-------------|------------|---------|-------|
| Subgroup S          | 3       | 0.988    | 0.885       | 0.999       | 1.220      | < 0.001 | 3.629 |
| Subgroup N          | 2       | 0.867    | 0.641       | 0.960       | 0.662      | 0.005   | 2.835 |
| Subgroup S-N        | 3       | 0.968    | 0.899       | 0.990       | 0.627      | < 0.001 | 5.454 |
| Subgroup Not stated | 1       | 0.950    | 0.919       | 0.970       | 0.265      | NA      | NA    |
| Subgroup E-N        | 1       | 0.150    | 0.069       | 0.296       | 0.443      | NA      | NA    |
| Overall             | 10      | 0.942    | 0.854       | 0.978       | 0.519      | < 0.001 | 5.363 |

### Heterogeneity

| Studies             | Q (df)     | Het. p-Val | I <sup>2</sup> |
|---------------------|------------|------------|----------------|
| Subgroup S          | 19.643 (2) | < 0.001    | 89.82 %        |
| Subgroup N          | 1.925 (1)  | 0.165      | 48.06 %        |
| Subgroup S-N        | 8.987 (2)  | 0.011      | 77.75 %        |
| Subgroup Not stated | NA         | NA         | NA             |
| Subgroup E-N        | NA         | NA         | NA             |

Overall 186.307 (9) < 0.001 95.17 %

## Additional table 2: ELISA Subgroup Meta-analysis

### a: IgG ELISA

Diagnostic Random-Effects Model

#### Metric: Sensitivity

Model Results

| Subgroups              | Studies | Estimate | Lower bound | Upper bound | Std. error | p-Val   | z-Val |
|------------------------|---------|----------|-------------|-------------|------------|---------|-------|
| Subgroup S             | 5       | 0.761    | 0.656       | 0.842       | 0.262      | < 0.001 | 4.424 |
| Subgroup N             | 4       | 0.851    | 0.709       | 0.930       | 0.434      | < 0.001 | 4.009 |
| Subgroup Not specified | 1       | 0.820    | 0.707       | 0.896       | 0.326      | NA      | NA    |
| Overall                | 10      | 0.798    | 0.730       | 0.852       | 0.192      | < 0.001 | 7.138 |

Heterogeneity

| Studies                | Q (df)     | Het. p-Val | I <sup>2</sup> |
|------------------------|------------|------------|----------------|
| Subgroup S             | 17.238 (4) | 0.002      | 76.79 %        |
| Subgroup N             | 19.415 (3) | < 0.001    | 84.55 %        |
| Subgroup Not specified | NA         | NA         | NA             |
| Overall                | 41.038 (9) | < 0.001    | 78.07 %        |

Diagnostic Random-Effects Model

#### Metric: Specificity

Model Results

| Subgroups              | Studies | Estimate | Lower bound | Upper bound | Std. error | p-Val   | z-Val |
|------------------------|---------|----------|-------------|-------------|------------|---------|-------|
| Subgroup S             | 5       | 0.972    | 0.889       | 0.993       | 0.739      | < 0.001 | 4.776 |
| Subgroup N             | 4       | 0.990    | 0.950       | 0.998       | 0.840      | < 0.001 | 5.453 |
| Subgroup Not specified | 1       | 0.998    | 0.973       | 1.000       | 1.415      | NA      | NA    |
| Overall                | 10      | 0.985    | 0.954       | 0.995       | 0.589      | < 0.001 | 7.119 |

## Heterogeneity

| Studies                | Q (df)     | Het. p-Val | I <sup>2</sup> |
|------------------------|------------|------------|----------------|
| Subgroup S             | 28.638 (4) | < 0.001    | 86.03 %        |
| Subgroup N             | 7.748 (3)  | 0.052      | 61.28 %        |
| Subgroup Not specified | NA         | NA         | NA             |
| Overall                | 59.869 (9) | < 0.001    | 84.97 %        |

## b: IgM ELISA

### Diagnostic Random-Effects Model

#### Metric: Sensitivity

##### Model Results

| Subgroups              | Studies | Estimate | Lower bound | Upper bound | Std. error | p-Val   | z-Val |
|------------------------|---------|----------|-------------|-------------|------------|---------|-------|
| Subgroup S             | 5       | 0.824    | 0.748       | 0.881       | 0.233      | < 0.001 | 6.621 |
| Subgroup N             | 4       | 0.814    | 0.677       | 0.901       | 0.376      | < 0.001 | 3.920 |
| Subgroup Not specified | 2       | 0.785    | 0.102       | 0.992       | 1.772      | 0.465   | 0.731 |
| Overall                | 11      | 0.800    | 0.718       | 0.863       | 0.232      | < 0.001 | 5.985 |

## Heterogeneity

| Studies                | Q (df)      | Het. p-Val | I <sup>2</sup> |
|------------------------|-------------|------------|----------------|
| Subgroup S             | 13.756 (4)  | 0.008      | 70.92 %        |
| Subgroup N             | 16.503 (3)  | < 0.001    | 81.82 %        |
| Subgroup Not specified | 6.034 (1)   | 0.014      | 83.43 %        |
| Overall                | 68.840 (10) | < 0.001    | 85.47 %        |

### Diagnostic Random-Effects Model

#### Metric: Specificity

##### Model Results

| Subgroups  | Studies | Estimate | Lower bound | Upper bound | Std. error | p-Val   | z-Val |
|------------|---------|----------|-------------|-------------|------------|---------|-------|
| Subgroup S | 5       | 0.988    | 0.967       | 0.995       | 0.514      | < 0.001 | 8.524 |

|                        |    |       |       |       |       |         |       |
|------------------------|----|-------|-------|-------|-------|---------|-------|
| Subgroup N             | 4  | 0.996 | 0.987 | 0.999 | 0.634 | < 0.001 | 8.789 |
| Subgroup Not specified | 2  | 0.905 | 0.252 | 0.996 | 1.704 | 0.186   | 1.322 |
| Overall                | 11 | 0.989 | 0.957 | 0.997 | 0.727 | < 0.001 | 6.229 |

#### Heterogeneity

| Studies                | Q (df)       | Het. p-Val | I <sup>2</sup> |
|------------------------|--------------|------------|----------------|
| Subgroup S             | 6.833 (4)    | 0.145      | 41.46 %        |
| Subgroup N             | 0.651 (3)    | 0.885      | 0 %            |
| Subgroup Not specified | 5.702 (1)    | 0.017      | 82.46 %        |
| Overall                | 100.762 (10) | < 0.001    | 90.08 %        |

### c: IgG-IgM ELISA

#### Diagnostic Random-Effects Model

#### Metric: Sensitivity Model Results

| Subgroups  | Studies | Estimate | Lower bound | Upper bound | Std. error | p-Val   | z-Val  |
|------------|---------|----------|-------------|-------------|------------|---------|--------|
| Subgroup S | 3       | 0.881    | 0.754       | 0.947       | 0.449      | < 0.001 | 4.459  |
| Subgroup N | 2       | 0.813    | 0.770       | 0.850       | 0.134      | < 0.001 | 10.989 |
| Overall    | 5       | 0.834    | 0.784       | 0.875       | 0.168      | < 0.001 | 9.634  |

#### Heterogeneity

| Studies    | Q (df)    | Het. p-Val | I <sup>2</sup> |
|------------|-----------|------------|----------------|
| Subgroup S | 7.242 (2) | 0.027      | 72.38 %        |
| Subgroup N | 0.453 (1) | 0.501      | 0 %            |
| Overall    | 8.354 (4) | 0.079      | 52.12 %        |

#### Diagnostic Random-Effects Model

#### Metric: Specificity Model Results

| Subgroups | Studies | Estimate | Lower bound | Upper bound | Std. error | p-Val | z-Val |
|-----------|---------|----------|-------------|-------------|------------|-------|-------|
|-----------|---------|----------|-------------|-------------|------------|-------|-------|

|            |   |       |       |       |       |         |        |
|------------|---|-------|-------|-------|-------|---------|--------|
| Subgroup S | 3 | 0.978 | 0.961 | 0.988 | 0.305 | < 0.001 | 12.494 |
| Subgroup N | 2 | 0.980 | 0.901 | 0.996 | 0.856 | < 0.001 | 4.537  |
| Overall    | 5 | 0.977 | 0.962 | 0.986 | 0.257 | < 0.001 | 14.565 |

#### Heterogeneity

| Studies    | Q (df)    | Het. p-Val | I <sup>2</sup> |
|------------|-----------|------------|----------------|
| Subgroup S | 1.562 (2) | 0.458      | 0 %            |
| Subgroup N | 1.652 (1) | 0.199      | 39.47 %        |
| Overall    | 3.368 (4) | 0.498      | 0 %            |
